# Supplementary material for: High thermoelectric figure of merit in well optimized YbyCo4Sb12
Source: Royal Society of Chemistry journal article supplement (doi:10.1039/d0tc03455j), 2020-01-01
Supplement: d0tc03455j1.pdf [file d0tc03455j1.pdf]

## High thermoelectric figure of merit in well optimized and non-nanostructured $\text{Yb}_y\text{Co}_4\text{Sb}_{12}$

E. Alleno<sup>1,\*</sup>, M. Benyahia<sup>1</sup>, J.B. Vaney<sup>2</sup>, K. Provost<sup>1</sup>, V. Paul-Boncour<sup>1</sup>, J. Monnier<sup>1</sup>, A. Dauscher<sup>2</sup>, B. Lenoir<sup>2</sup>

<sup>1</sup> Univ Paris Est Creteil, CNRS, ICMPE, UMR 7182, 2 rue H. Dunant, F-94320 THIAIS, France

<sup>2</sup> Université de Lorraine, Institut Jean Lamour, UMR 7198 CNRS-UL, 2 allée André Guinier, 54011 NANCY, France

### SUPPLEMENTARY MATERIAL

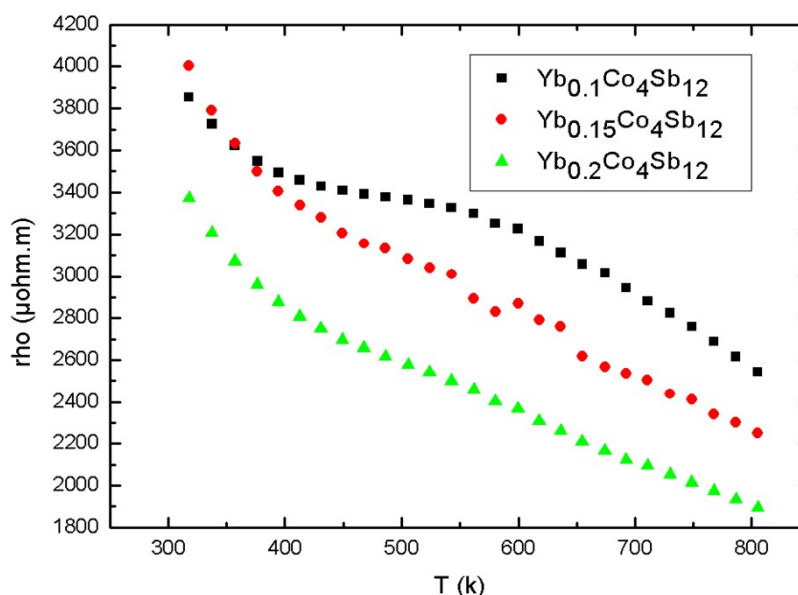

Fig. S1. Electrical resistivity in the first set  $\text{Yb}_y\text{Co}_4\text{Sb}_{12}$  samples ( $y = 0.10, 0.15, 0.20$ ) as a function of temperature. These measurements were carried out after spark-plasma sintering the powders used in the XANES experiment, which had been ground in air.

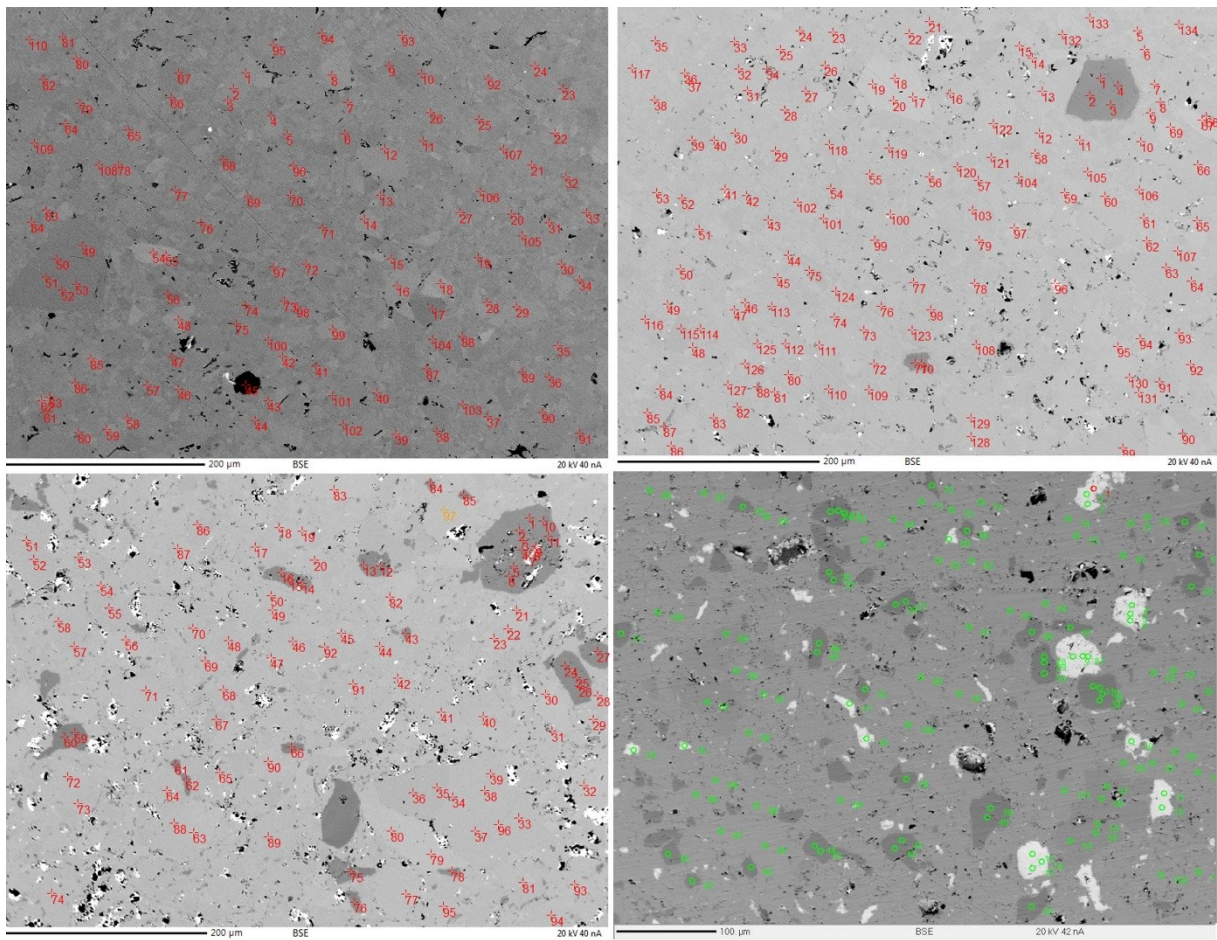

Fig. S2. Back-scattered electron image obtained with the electron micro-probe on some of the samples from set2. Yb<sub>0.2</sub>Co<sub>4</sub>Sb<sub>12</sub> (top-left corner), Yb<sub>0.3</sub>Co<sub>4</sub>Sb<sub>12</sub> (top-right corner), Yb<sub>0.4</sub>Co<sub>4</sub>Sb<sub>12</sub> (bottom-left corner) and Yb<sub>0.5</sub>Co<sub>4</sub>Sb<sub>12</sub> (bottom-right corner). The medium-grey phase is the skutterudite. The dark-grey phase is CoSb<sub>2</sub>. The white phase is YbSb<sub>2</sub>. The red or green dots and numbers represents the positions where the Electron Probe Micro-Analysis was performed.

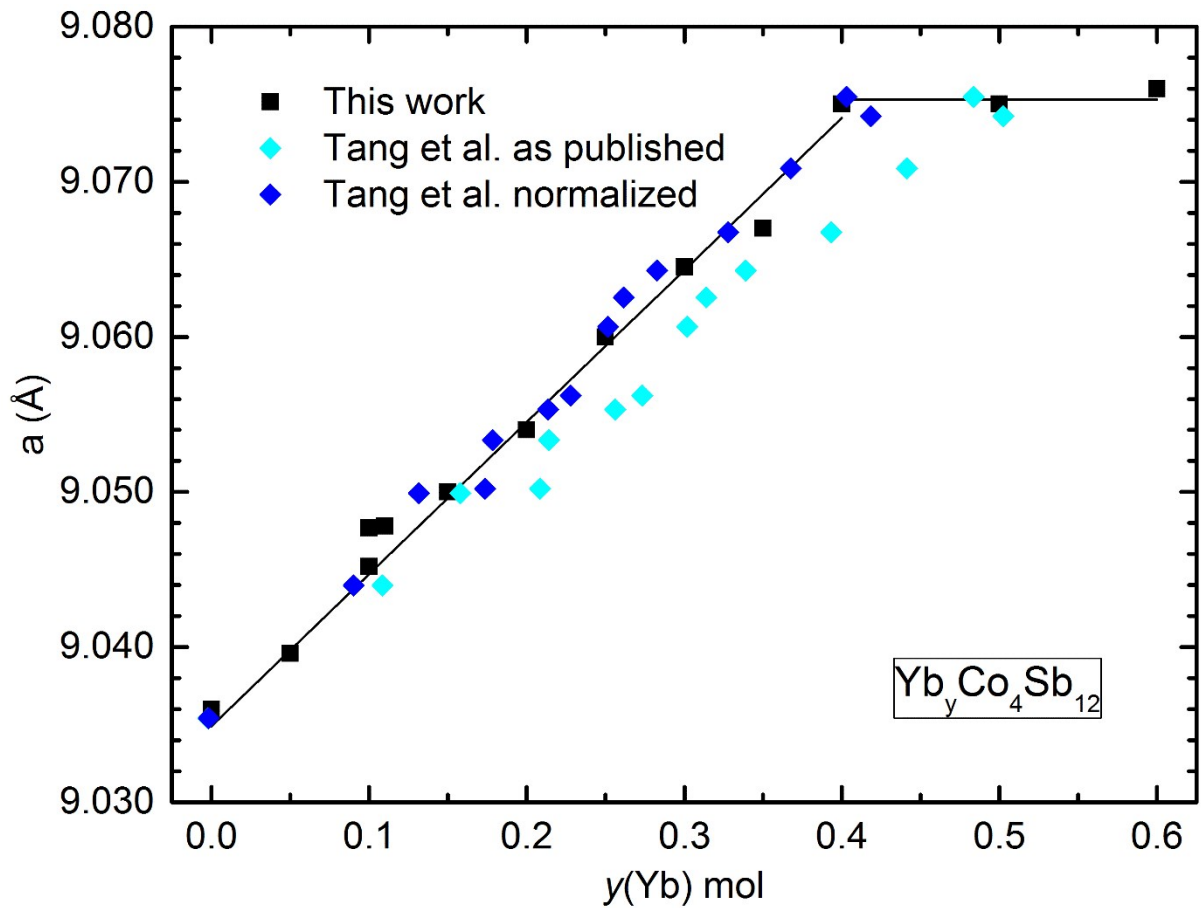

Fig. S3. Lattice parameter as a function of the ytterbium concentration in  $\text{Yb}_y\text{Co}_4\text{Sb}_{12}$  synthesized at 1073 K. Comparison of the data of this work with the data of Tang et al.<sup>1</sup>. For this work  $y$  is both the nominal and effective ytterbium concentration until the solubility limit is reached at  $y_{lim} = 0.41$ . In Tang et al.,  $y$  is the effective concentration measured by EPMA. Their data as published are shown along with their data where  $y$  has been normalized by 1.2. This 20% correction is required to make their sample with its composition measured by EPMA ( $y = 0.30$ ) match its nominal composition ( $y = 0.25$ ). After this correction, Tang et al. data match very well the present one.

| $T(K) \setminus y$ | 0.05 | 0.10 | 0.15 | 0.20 | 0.25 | 0.30 | 0.35 | 0.40 |
|--------------------|------|------|------|------|------|------|------|------|
| 300                | 1.55 | 1.66 | 1.80 | 1.85 | 1.93 | 2.01 | 2.11 | 2.22 |
| 400                | 1.53 | 1.60 | 1.71 | 1.75 | 1.82 | 1.89 | 1.98 | 2.11 |
| 500                | 1.52 | 1.57 | 1.66 | 1.69 | 1.74 | 1.80 | 1.89 | 2.01 |
| 600                | 1.51 | 1.55 | 1.62 | 1.64 | 1.69 | 1.74 | 1.82 | 1.93 |
| 700                | 1.51 | 1.54 | 1.60 | 1.62 | 1.65 | 1.7  | 1.76 | 1.86 |
| 800                | 1.50 | 1.53 | 1.58 | 1.59 | 1.63 | 1.67 | 1.72 | 1.81 |

Table SI. Lorenz number calculated as a function of the ytterbium concentration ( $y$ ) and temperature ( $T$ ). The unit is  $10^{-8} \text{ V}^2 \text{ K}^{-2}$ . The values for the  $y = 0.50$  and  $0.60$  samples were taken equal to those of the  $y = 0.40$  sample.

The model used here is a single parabolic band model with an effective density of states mass  $m^* = 3.2m_e$  ( $m_e$  is the bare electron mass) and an electronic relaxation time  $\tau = \tau_0 \varepsilon^{-1/2}$ . The ytterbium concentration is related to the measured Hall electron concentration  $n$  at 300 K through the expressions:  $n(y, 300K) = n_{Hall}(y, 300K)$ . The reduced chemical potential  $\eta$  ( $\eta = \mu/k_B T$ ) is related to  $y$  through the electron concentration

$$n(\eta, T) = 4\pi \left( \frac{2m^* k_B T}{h^2} \right)^{\frac{3}{2}} F_{\frac{1}{2}}(\eta)$$

$n(y, T) = n(\eta, T)$  by solving for  $\eta$  the following equation:

defined by the expression:  $F_q = \int_0^{\infty} \frac{x^q}{[1 + e^{(x-\eta)}]} dx$  where  $x = \frac{\varepsilon}{k_B T}$  is the reduced energy. Finally, the Lorenz number is related to  $\eta$  by the expression:

$$L(\eta(n, T)) = \left( \frac{k_B}{e} \right)^2 \frac{3F_0(\eta)F_2(\eta) - 4F_1(\eta)^2}{F_0(\eta)^2}$$

These  $L(y, T)$  values were used to calculate the lattice thermal conductivity using the

expression: 
$$\lambda_L(y, T) = \lambda(y, T) - \frac{L(y, T)T}{\rho(y, T)}.$$

1. Tang, Y.; Chen, S.-W.; Snyder, G. J., Temperature dependent solubility of Yb in Yb-CoSb<sub>3</sub> skutterudite and its effect on preparation, optimization and lifetime of thermoelectrics. *Journal of Materiomics* **2015**, 1 (1), 75-84.
